# Supplementary material
Source: publisher site journal article supplement (https://www.spandidos-publications.com/4643/downloadSupplementary)

Figure S1. Kaplan-Meier estimates of OS in NAC (+) patients according to the presence of LY. The 3-year OS rate is shown as a percentage in the square. LY factors were diagnosed based on the Japanese Classification of Esophageal Cancer (11th Edition) edited by the Japan Esophageal Society (22,23). OS, overall survival; NAC, neoadjuvant chemotherapy; LY, lymphatic invasion.

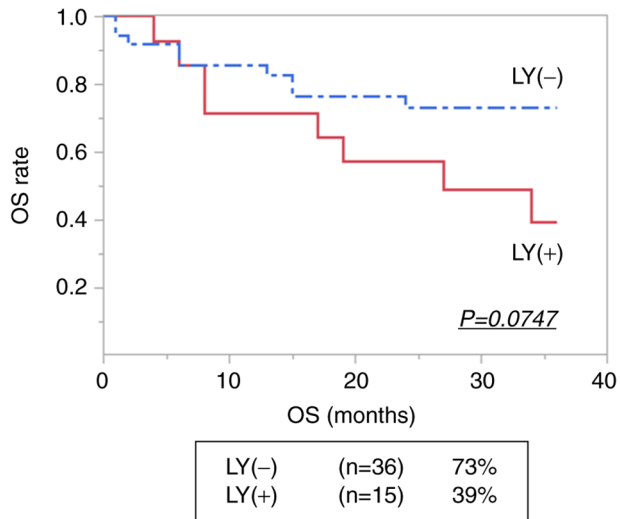

Supplement: Supplementary file 1 [file downloadSupplementary]
